# Supplementary material for: Detection of Helicobacter pylori in dental plaque using a DNA biosensor for noninvasive diagnosis
Source: Royal Society of Chemistry journal article supplement (doi:10.1039/c8ra03134g), 2018-01-01
Supplement: c8ra03134g1.pdf [file c8ra03134g1.pdf]

## Detection of *Helicobacter pylori* in dental plaque using a DNA biosensor for noninvasive diagnosis

Li-Li Chen<sup>a</sup>, Hui-Fang Cui<sup>a,\*</sup>, Shuang-Fei Fan<sup>a</sup>, Zong-Yi Li<sup>a</sup>, Shuang-Yin Han<sup>b</sup>, Xin Ma<sup>c</sup>, Shu-Wen Luo<sup>c</sup>, Xiaojie Song<sup>a</sup>, Qi-Yan Lv<sup>a</sup>

<sup>a</sup> Department of Bioengineering, School of Life Sciences, Zhengzhou University, 100# Science Avenue, Zhengzhou, 450001, PR China

<sup>b</sup> Division of Gastroenterology, Henan Provincial People's Hospital, 7# Weiwu Road, Zhengzhou, 450000, PR China

<sup>c</sup> Division of Stomatology, Henan Provincial People's Hospital, 7# Weiwu Road, Zhengzhou, 450000, PR China

### 1. Verification of the *H. pylori* culture

The *H. pylori* (HP) culture was verified through morphological observation, and various biochemistry tests (Figure S-1). As shown in Figure S-1A, transparent, round colonies were grown on the Brucella broth agar medium. The urease test with the HP test paper show a positive result (Figure S-1B). In addition, the catalase test in reaction with H<sub>2</sub>O<sub>2</sub> produced obvious O<sub>2</sub> bubbles (Figure S-1C), and the oxidase test in reaction with N,N-dimethyl-p-phenylenediamine dihydrochloride (DMPDA) turned out a purple product (Figure S-1D). These tests identified positive *H. pylori* in the culture.

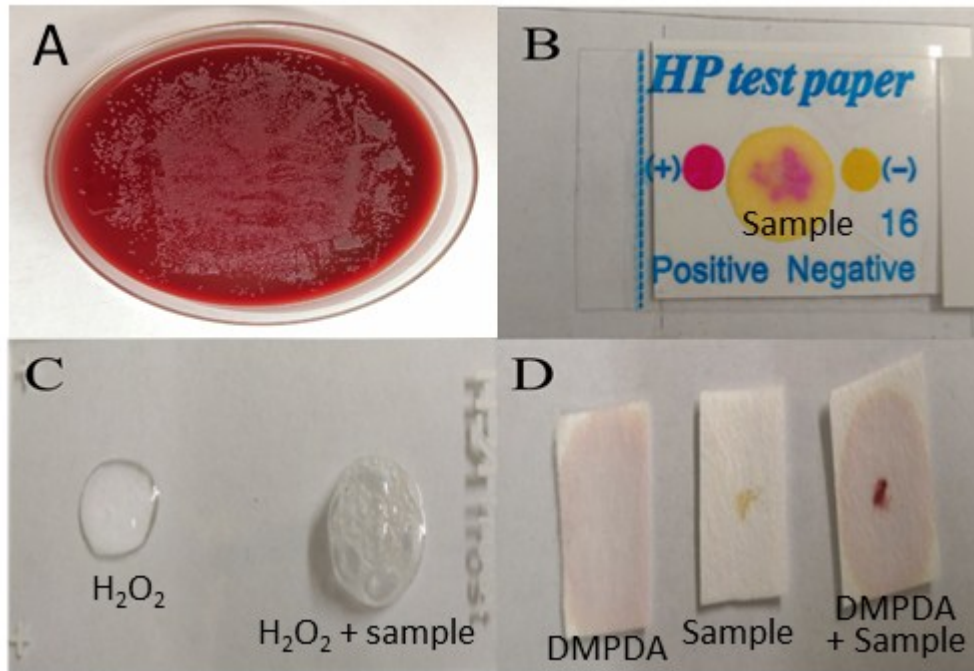

**Figure S-1.** Verification of the *H. pylori* culture. (A) Picture of the *H. pylori* colonies on Brucella broth agar medium supplemented with 10% goat blood. (B) The *H. pylori* urease test result of the *H. pylori* culture sample. (C) The catalase test result of the *H. pylori* culture sample in reaction with H<sub>2</sub>O<sub>2</sub>. (D) The oxidase test result of the *H. pylori* culture sample in reaction with 1% N,N-dimethyl-p-phenylenediamine dihydrochloride (DMPDA).

## 2. Gel electrophoresis measurement for colony PCR products of the dental plaque samples

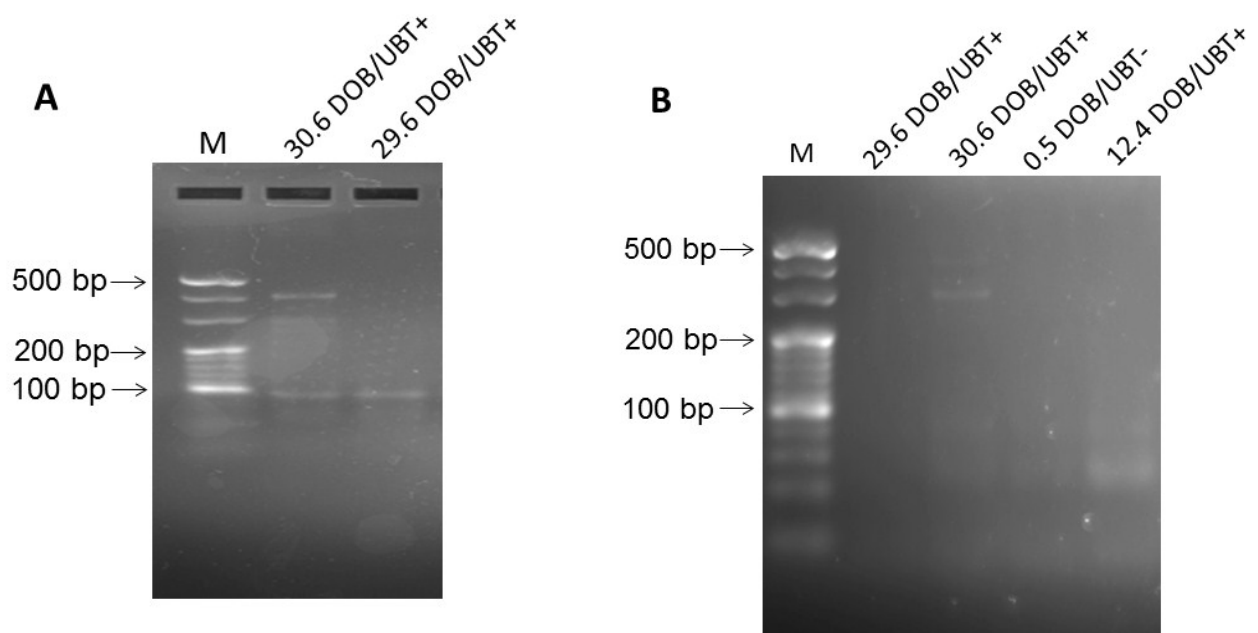

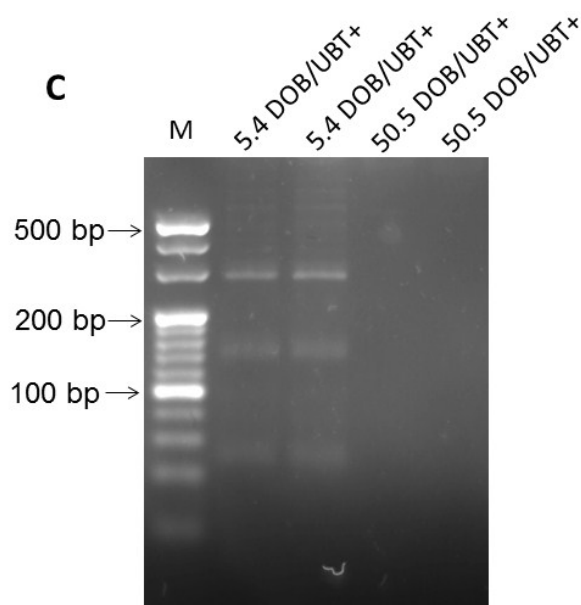

**Figure S-2.** The agarose (3.5%) gel electrophoresis results of the *H. pylori* colony PCR products of the dental plaque samples collected from the *H. pylori* positive patients/volunteers (UBT  $\geq 4.0$ ), and the *H. pylori* negative patients/volunteers (UBT  $< 4.0$ ). M was from a DNA marker. Others Lanes 2 were the PCR products loadings. The gels were stained with GoldView I for observation. The designated PCR products of the *H. pylori* colony was 104 bp.

### 3. The biosensor performances in detecting dsDNA

**Table S-1. Comparison of the proposed biosensor with other DNA biosensors**

| Modified material | Detection method | Target DNA | Linear range (nM)       | Detection limit (nM)  | References |
|-------------------|------------------|------------|-------------------------|-----------------------|------------|
| L-cysteine        | DPV              | ssDNA      | 18.75–250               | 18.13                 | 34         |
| AuNPs/PEM         | DPV              | ssDNA      | 0.01–1.0 $\times 10^4$  | 0.01                  | 35         |
| AuNPs/TB-GO       | DPV              | ssDNA      | 0.01–1.0                | 2.95 $\times 10^{-3}$ | 36         |
| GNRs              | CV               | ssDNA      | 0.001–1.0 $\times 10^3$ | 2.0 $\times 10^{-3}$  | 37         |
| GA/Th-G/GA/Cys    | DPV              | ssDNA      | 0.001–100               | 1.26 $\times 10^{-4}$ | 38         |
| AuNP <sub>S</sub> | DPV              | dsDNA      | 0.000033–0.0065         | 3.2 $\times 10^{-5}$  | This work  |
